# Supplementary material for: A Self‐Assembled 3D Model Demonstrates How Stiffness Educates Tumor Cell Phenotypes and Therapy Resistance in Pancreatic Cancer
Source: PubMed Central journal article supplement (PMC11468796; doi:10.1002/adhm.202301941), 2024-03-22
Supplement: ADHM-13-2301941-s001.pdf [file ADHM-13-2301941-s001.pdf]

# ADVANCED HEALTHCARE MATERIALS

## Supporting Information

for *Adv. Healthcare Mater.*, DOI 10.1002/adhm.202301941

A Self-Assembled 3D Model Demonstrates How Stiffness Educates Tumor Cell Phenotypes and Therapy Resistance in Pancreatic Cancer

*Ying Liu, Babatunde O. Okesola, David Osuna de la Peña, Weiqi Li, Meng-Lay Lin, Sara Trabulo, Marianthi Tatari, Rita T. Lawlor, Aldo Scarpa, Wen Wang, Martin Knight, Daniela Loessner, Christopher Heeschen\*, Alvaro Mata\* and Oliver M. T. Pearce\**

## Supporting Information

**A self-assembled 3D model demonstrates how stiffness educates tumor cell phenotypes and therapy resistance in pancreatic cancer**

*Ying Liu<sup>1,2</sup>, Babatunde O. Okesola<sup>3</sup>, David Osuna de la Peña<sup>1,2</sup>, Weiqi Li<sup>2</sup>, Meng-Lay Lin<sup>1</sup>, Sara Maria David Trabulo<sup>1</sup>, Marianthi Tatari<sup>1</sup>, Rita T. Lawlor<sup>4,5</sup>, Aldo Scarpa<sup>4,5</sup>, Wen Wang<sup>2</sup>, Martin Knight<sup>6,7</sup>, Daniela Loessner<sup>1,8,9,10</sup>, Christopher Heeschen<sup>11,12\*</sup>, Alvaro Mata<sup>13,14,15\*</sup>, Oliver M. T. Pearce<sup>1\*</sup>*

**This PDF file includes:**

Figs. S1 to S8

A

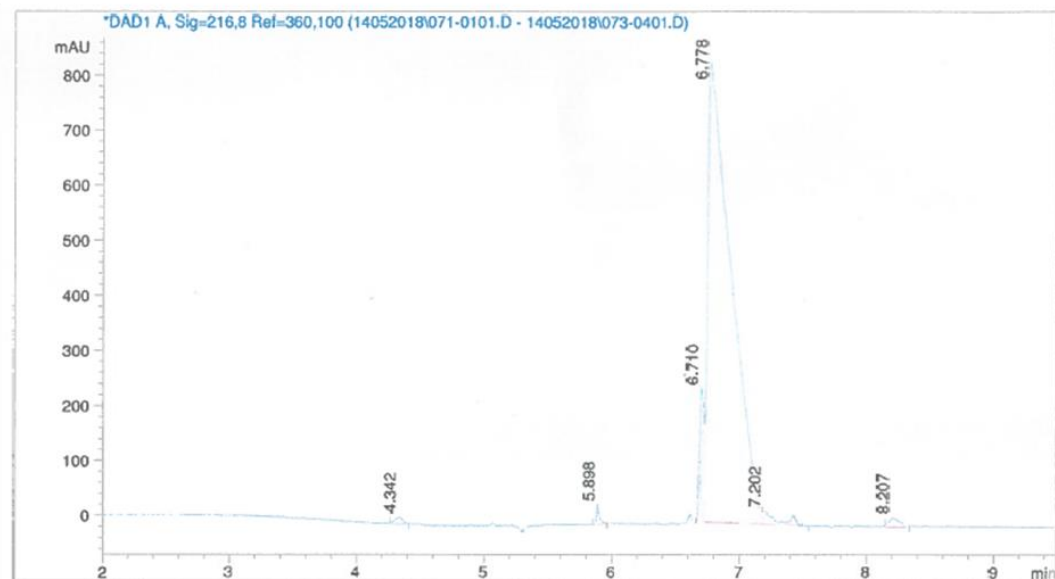

B

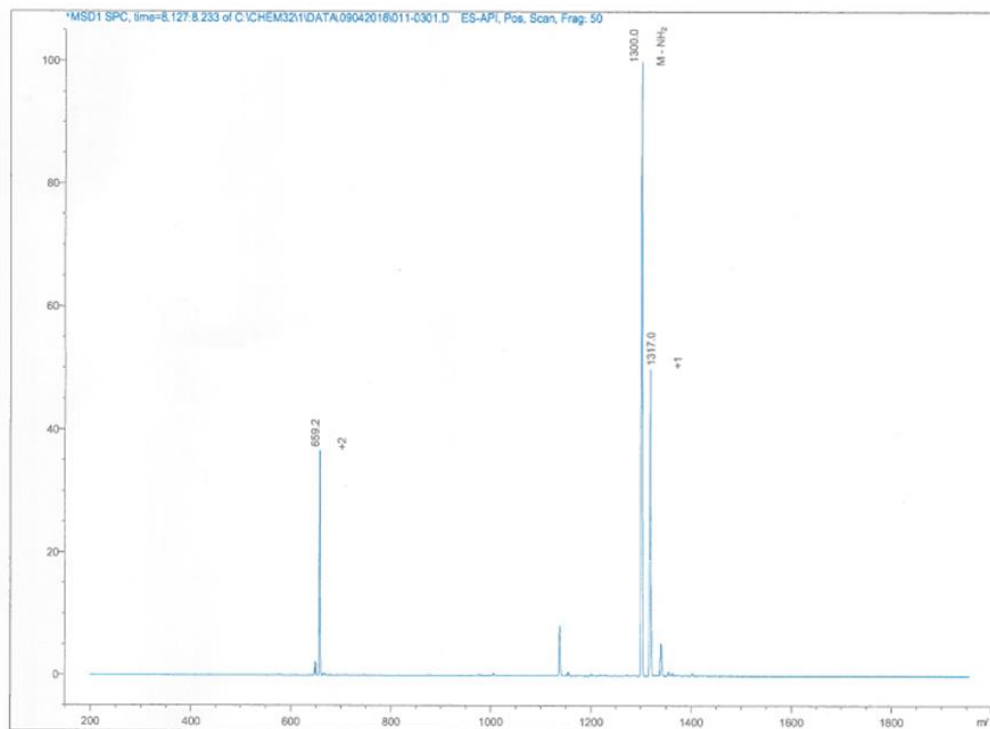

**Figure S1.** Molecular characterization of **PA-E3Y**. (A) Analytical reverse-phase high-performance liquid chromatography (RP-HPLC) trace of **PA-E3Y** (C<sub>16</sub>-V3A3E3Y) at 220 nm. Gradient: Acetonitrile–Water (+0.1% NH<sub>4</sub><sup>+</sup>). (B) Electrospray ionization mass spectrum (ESI-MS) of **PA-E3Y**.

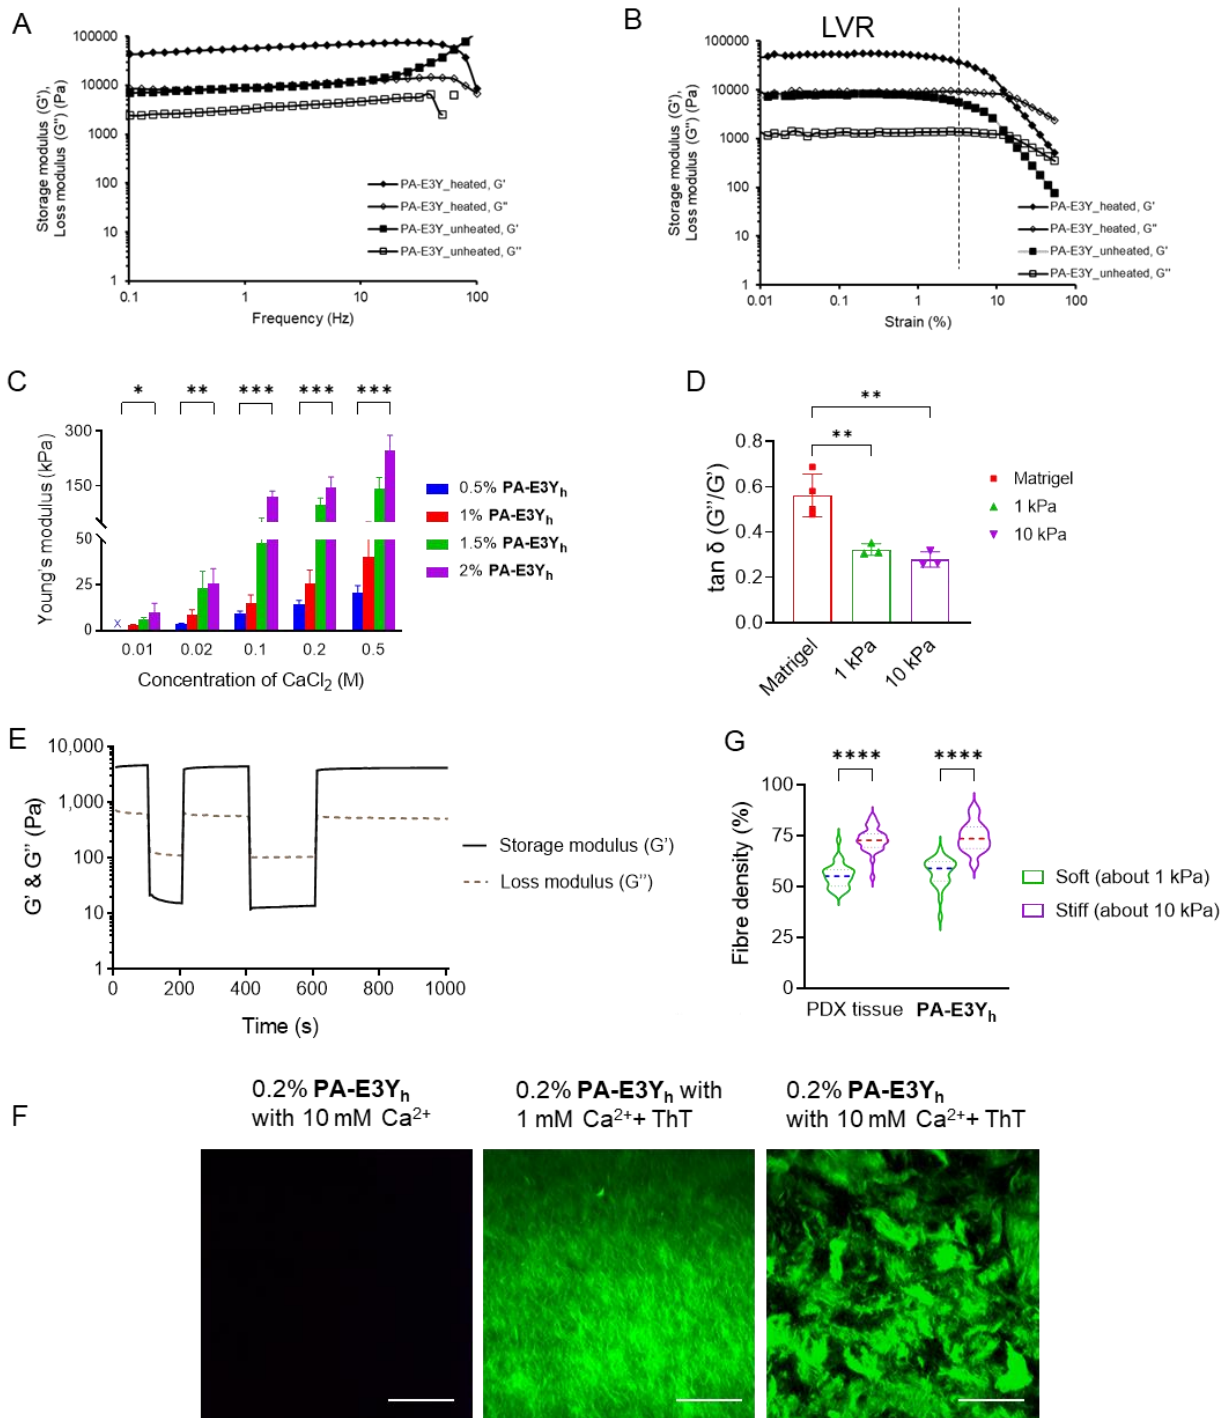

**Figure S2.** Characteristics of E3Y PA gel. (A) Frequency sweep rheographs of PA-E3Y and PA-E3Y<sub>h</sub> hydrogels at 1.0 % wt/v gelator concentration. (B) Amplitude sweep rheographs of PA-E3Y and PA-E3Y<sub>h</sub> hydrogels 1.0 % wt/v gelator concentration. (C) The stiffness of the PA-E3Y<sub>h</sub> hydrogels increased as the gelator increased ( $n = 3$ ). (D)  $\tan \delta$  values of Matrigel, 1 kPa and 10 kPa PA-E3Y<sub>h</sub> hydrogels.  $\tan \delta$  (the ratio of  $G''/G'$ ) represented the elasticity of the hydrogel, the lower  $\tan \delta$  value, the more elastic the gel ( $n = 3$ ). (E) Self-recovery or thixotropic property of 1%

**PA-E3Y<sub>h</sub>** hydrogels prepared with 0.05 M CaCl<sub>2</sub>. Thixotropic behaviour of **PA-E3Y<sub>h</sub>** hydrogel was measured at a constant frequency of 10 Hz and strain of 0.1% (100 s), 100% (100 s), 0.1% (200 s), 100% (200 s), and 0.1% (400 s). **(F)** Confocal micrographs of nanofibers of **PA-E3Y<sub>h</sub>** with different concentrations of CaCl<sub>2</sub>. Thioflavin T (0.4 mM) stained five times diluted 0.2% **PA-E3Y<sub>h</sub>** treated with 1 mM and 10 mM of CaCl<sub>2</sub>. The 0.2% **PA-E3Y<sub>h</sub>** –Ca<sup>2+</sup> at 10 mM without the ThT was used as a control, and there was no fluorescent signal detected ( $n = 3$ , scale bar: 100  $\mu\text{m}$ ). **(G)** Comparative analysis of the fiber density of PDX tissue and **PA-E3Y<sub>h</sub>** hydrogels. \*  $P < 0.05$ ; \*\*  $P < 0.01$ ; \*\*\*  $P < 0.001$ ; \*\*\*\*  $P < 0.0001$ .

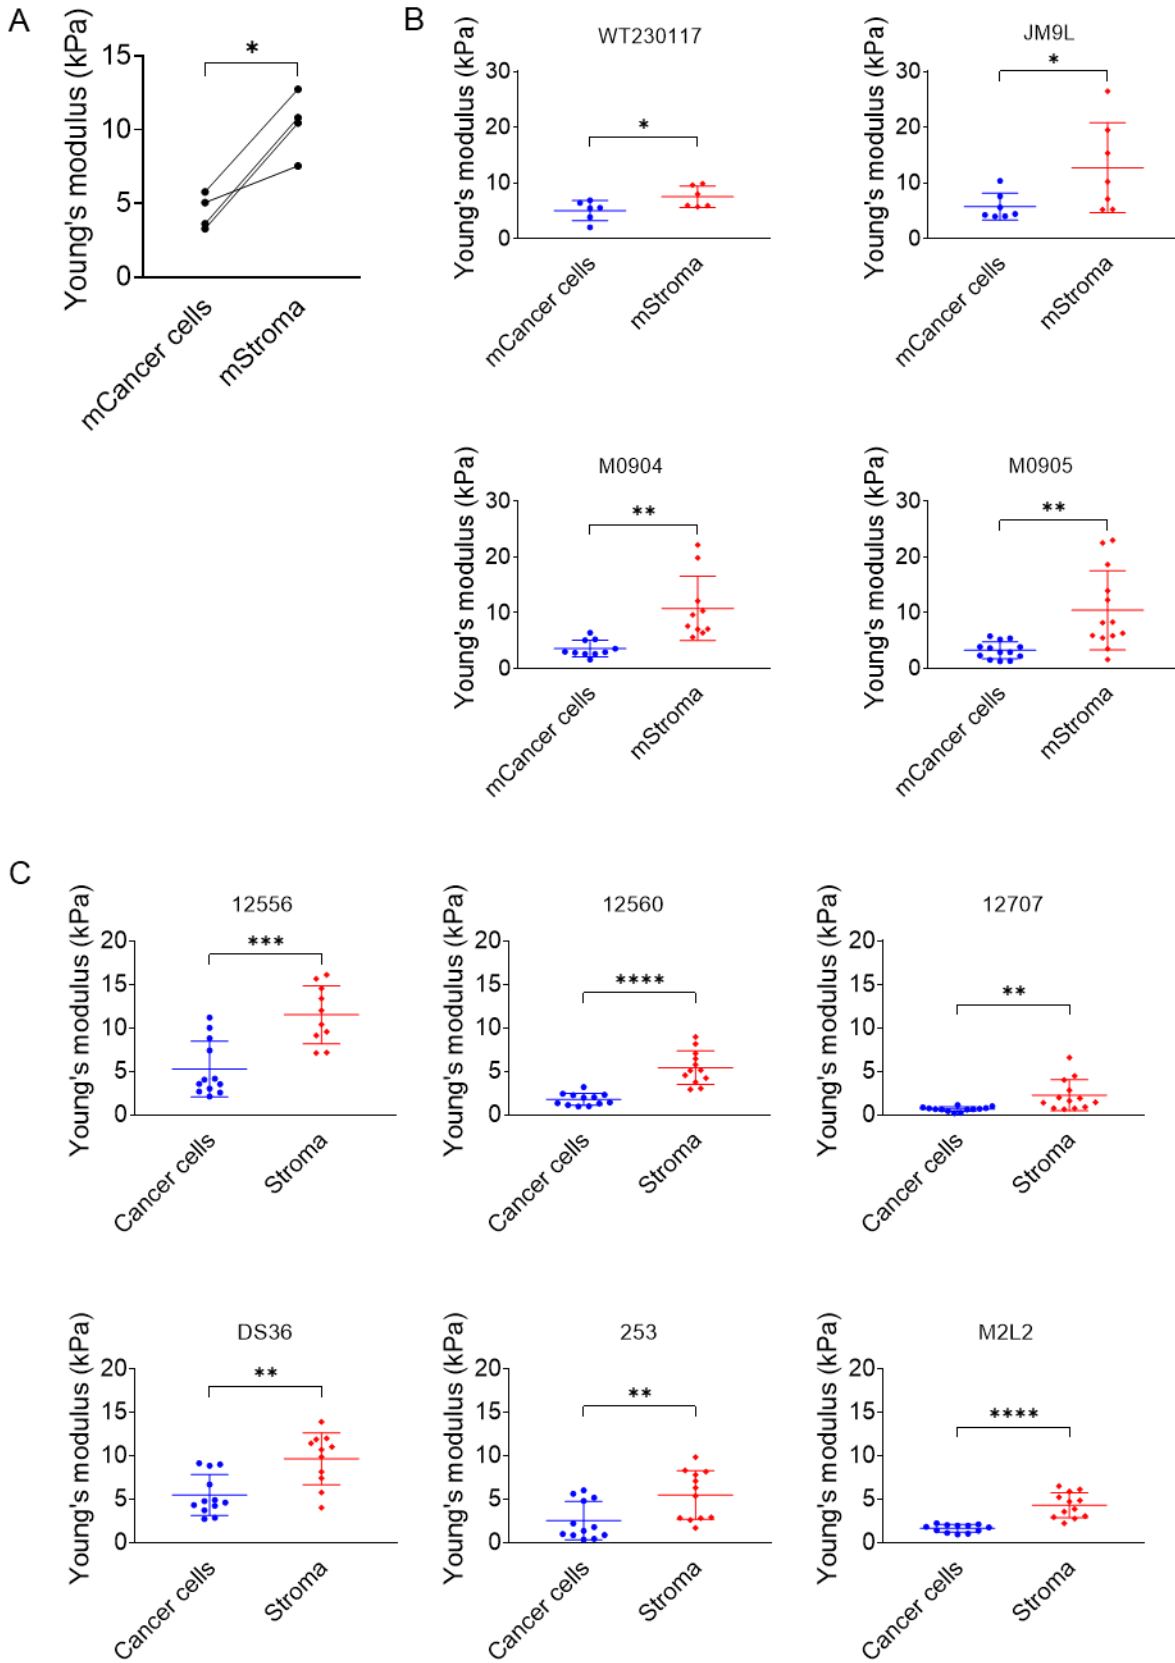

**Figure S3.** Stiffness of malignant and ECM area in pancreatic cancer patient-derived xenografts (PDXs) and mouse-derived allografts (MDAs). **(A)** Average stiffness of cancer cells and stroma areas in 4 MDAs tissue ( $n = 15$ ). **(B)** Stiffness of cancer cells and stroma areas in 4 MDAs tissue ( $n = 15$ ). **(C)** Stiffness of cancer cells and stroma areas in the 6 PDXs tissue ( $n = 15$ ). Three frozen tissue sections for each specimen were independently measured by AFM. Five force maps were obtained from each section, and every force map covered a size of  $50 \times 50 \mu\text{m}^2$  region under  $10 \times 10$  point grids representing 100 force curves. \*  $P < 0.05$ ; \*\*  $P < 0.01$ ; \*\*\*  $P < 0.001$ ; \*\*\*\*  $P < 0.0001$ .

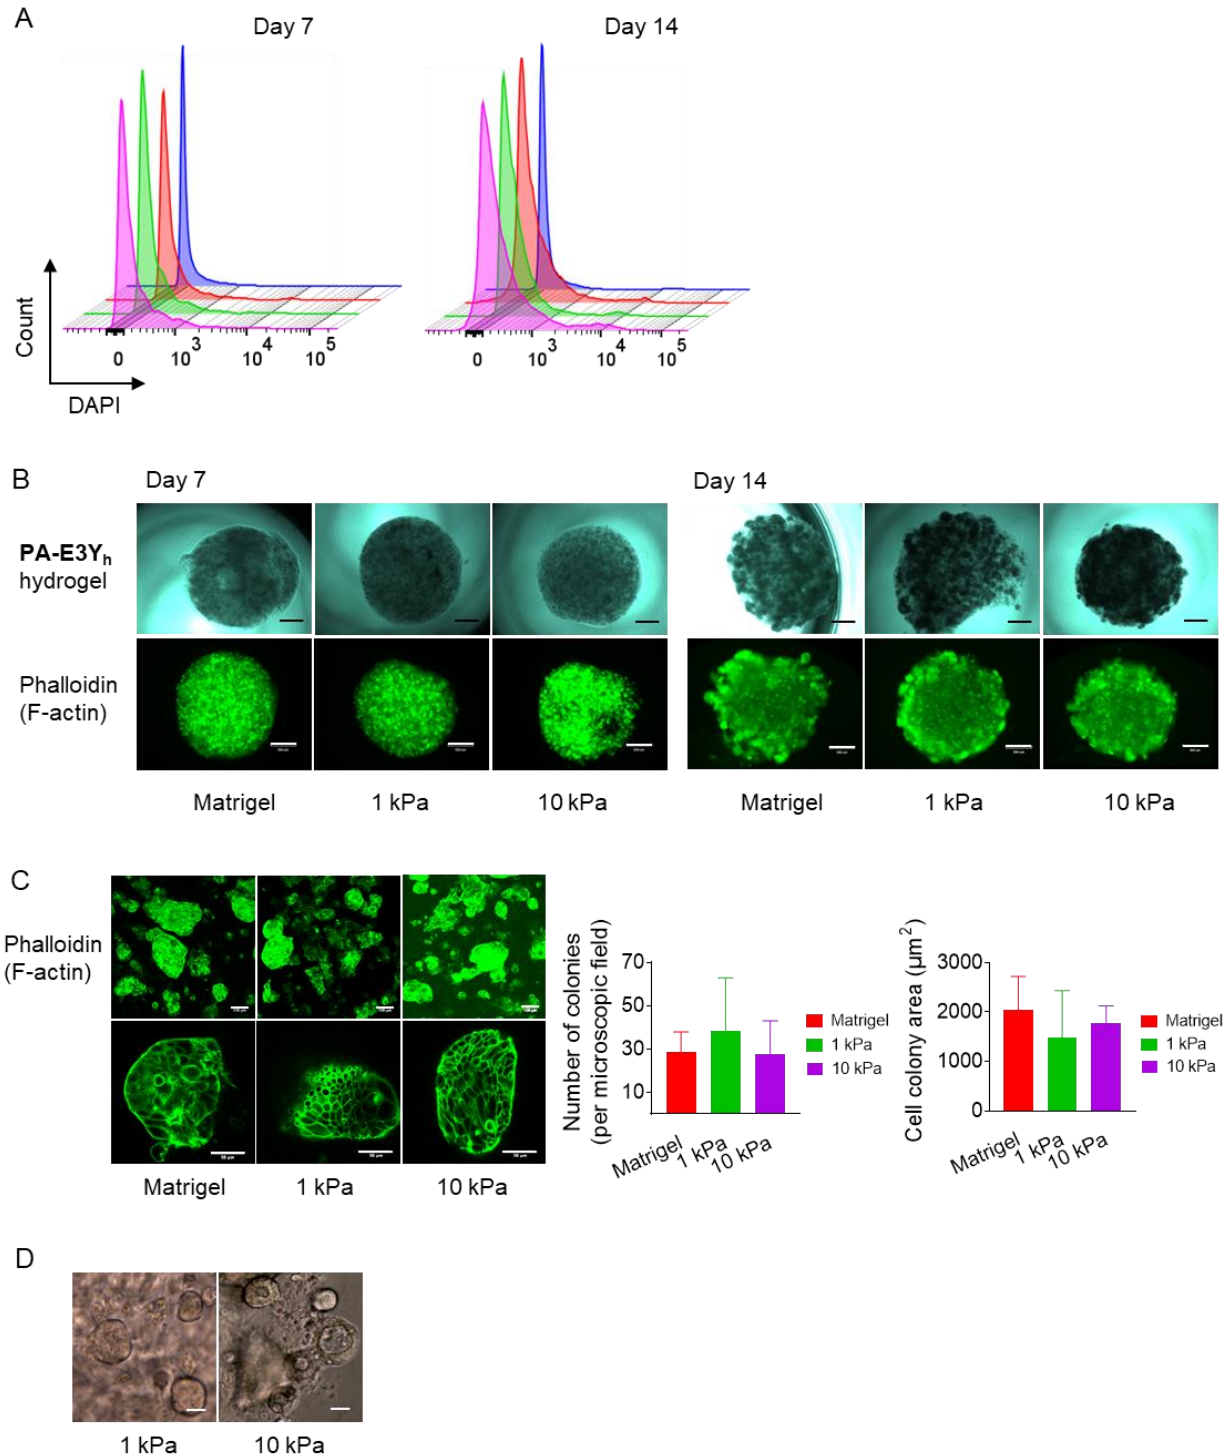

**Figure S4.** Cell viability and morphology of PDAC in Matrigel, 1 kPa and 10 kPa PA-E3Y<sub>h</sub> hydrogel. (A) Representative flow cytometry histograms for PDAC live cells (12556) derived from 2D, Matrigel, 1 and 10 kPa PA-E3Y<sub>h</sub> hydrogels. (B) Images of PDAC cells seeded in Matrigel, 1 and 10 kPa PA-E3Y<sub>h</sub> hydrogel for 7 and 14 days. Optical images of cell laden Matrigel and PA-



**E3Y<sub>h</sub>** hydrogels on Day 7 and 14 were taken on an optical microscope (Scale bar: 500  $\mu\text{m}$ ); and images of PDAC cells stained with Phalloidin in Matrigel and **PA-E3Y<sub>h</sub>** hydrogels on Days 7 and 14 were taken by fluorescent microscopy (Scale bar: 500  $\mu\text{m}$ ,  $n = 3$ ). (C) Cell colony formation in Matrigel, 1 and 10 kPa **PA-E3Y<sub>h</sub>** hydrogels for 14 days. The images at left side: The cell morphology was stained by Phalloidin and the images were taken by confocal microscopy (Scale bar in the upper images: 100  $\mu\text{m}$ ; scale bar in the bottom images: 50  $\mu\text{m}$ ). The histogram at right side: Analysis of the size and number of cell colonies in Matrigel, 1 and 10 kPa **PA-E3Y<sub>h</sub>** hydrogels ( $n = 3$ ). (D) Optical images of duct-like structure of PDAC in 1 and 10 kPa **PA-E3Y<sub>h</sub>** hydrogels (Scale bar: 100  $\mu\text{m}$ ,  $n = 3$ ). \*  $P < 0.05$ ; \*\*  $P < 0.01$ ; \*\*\*  $P < 0.001$ ; \*\*\*\*  $P < 0.0001$ .

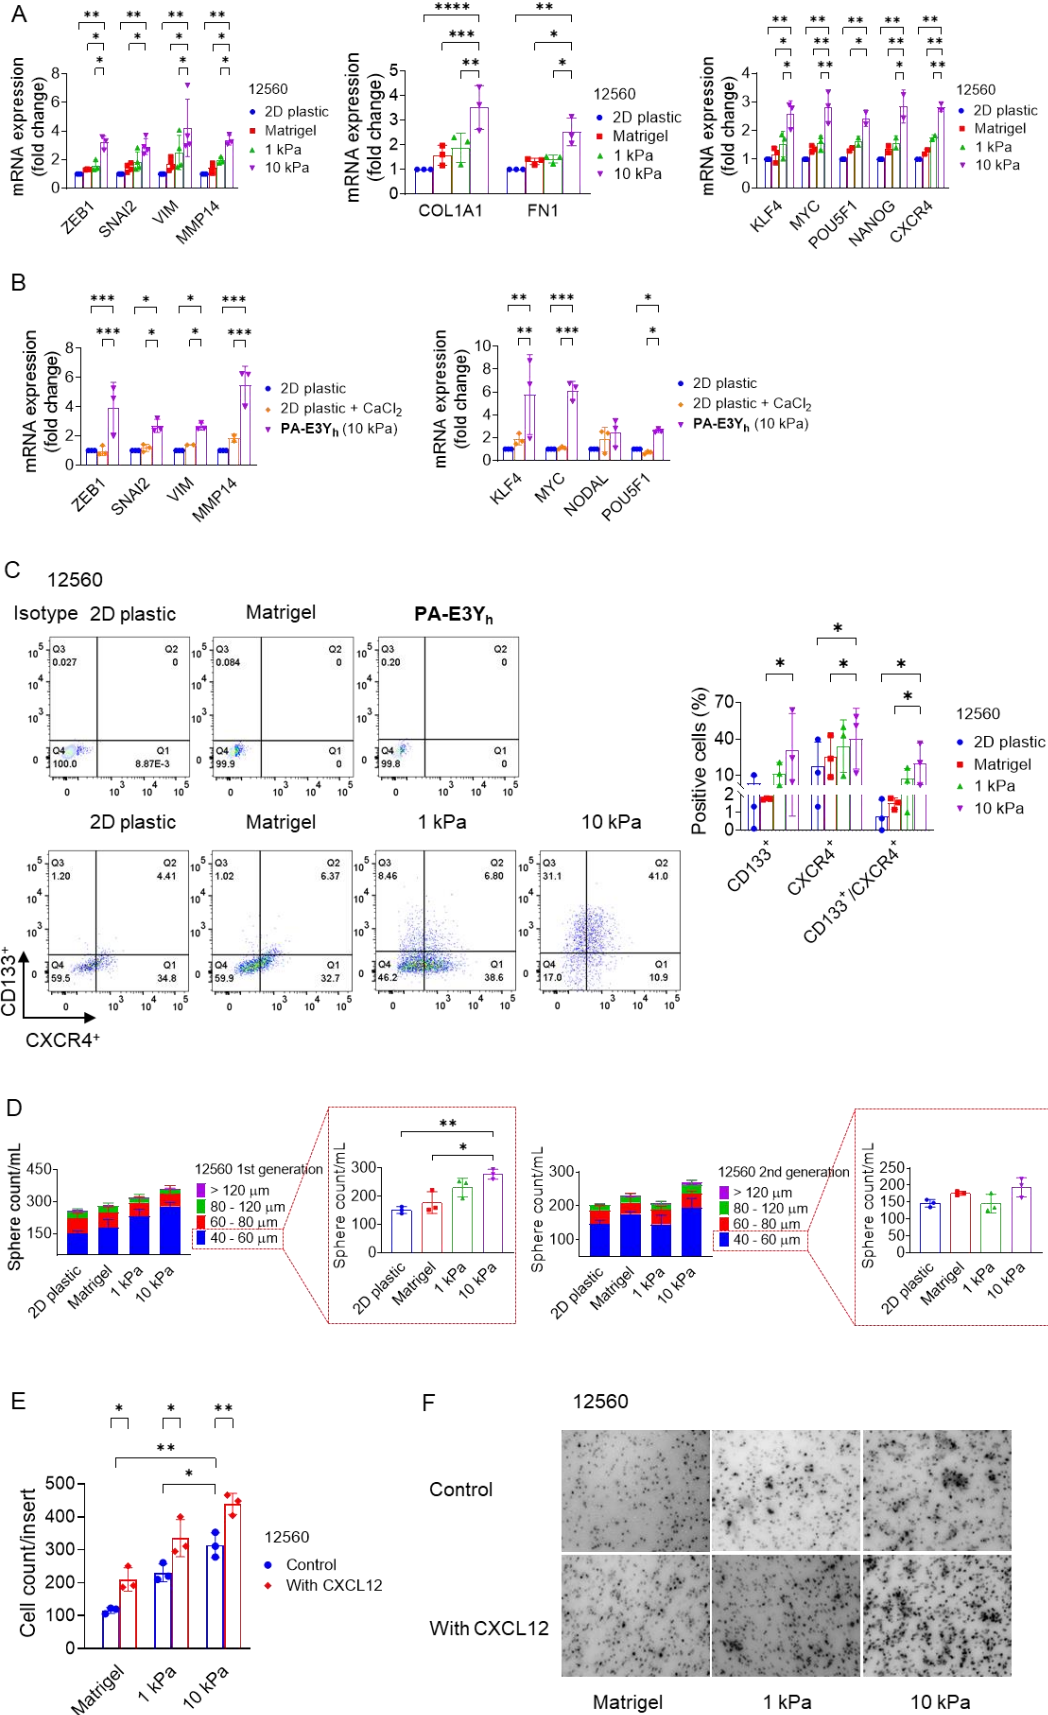

**Figure S5.** Matrix stiffness affects EMT and CSC phenotype in PDAC. **(A)** EMT, ECM and CSC related gene expression of PDAC cells (12560) cultured on 2D plastic, in Matrigel, 1, and 10 kPa **PA-E3Y<sub>h</sub>** hydrogels on day 4 were investigated by qPCR ( $n = 3$ ). **(B)** EMT and CSC related gene expression of PDAC cells on 2D plastic, 2D plastic with CaCl<sub>2</sub> and 10 kPa **PA-E3Y<sub>h</sub>** hydrogel ( $n = 3$ ). The 10 kPa **PA-E3Y<sub>h</sub>** hydrogel culture: The 10 kPa stiffness of **PA-E3Y<sub>h</sub>** hydrogels were prepared by mixing **PA-E3Y<sub>h</sub>** and 50 mM CaCl<sub>2</sub>, and the cell-laden hydrogel was cultured within 2 mL of sphere medium. 2D plastic with CaCl<sub>2</sub> culture: PDAC cells were cultured on 2D plastic within 2 mL of sphere medium plus the same amount of 50 mM CaCl<sub>2</sub> as 10 kPa **PA-E3Y<sub>h</sub>** hydrogel. **(C)** CD133<sup>+</sup>/CXCR4<sup>+</sup> CSC subpopulations were detected by flow cytometry for PDAC cells (12560) cultured in 2D plastic, Matrigel, 1 kPa and 10 kPa **PA-E3Y<sub>h</sub>** hydrogels. Representative flow cytometry plots are shown on the left, and the analysis for the percentage of CD133<sup>+</sup>, CXCR4<sup>+</sup> and CD133<sup>+</sup>/CXCR4<sup>+</sup> populations is provided on the right side ( $n = 3$ ). **(D)** Number of spheres by size range formed by PDAC cells (12560) derived from 2D plastic, Matrigel, 1 and 10 kPa **PA-E3Y<sub>h</sub>** hydrogel for first and second generation spheres ( $n = 3$ ). **(E)** Invasive capacity of PDAC cells (12560) derived from 2D plastic, Matrigel, 1 and 10 kPa **PA-E3Y<sub>h</sub>** hydrogels as assayed in Matrigel-coated transwell inserts, in the absence or presence of the specific chemoattractant CXCL12 ( $n = 3$ ). **(F)** Representative images of invasive PDAC cells (12560) derived from 2D plastic, Matrigel and **PA-E3Y<sub>h</sub>** hydrogel, transferred through the Matrigel-coated inserts with and without CXCL12. \*  $P < 0.05$ ; \*\*  $P < 0.01$ ; \*\*\*  $P < 0.001$ ; \*\*\*\*  $P < 0.0001$ .

A

Isotype, 12560 PDAC cells

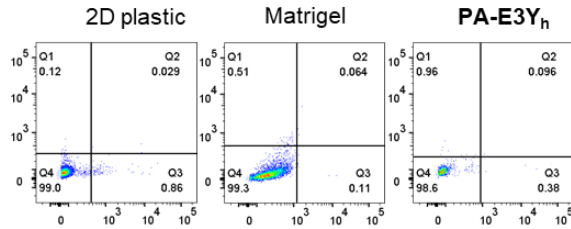

Untreated

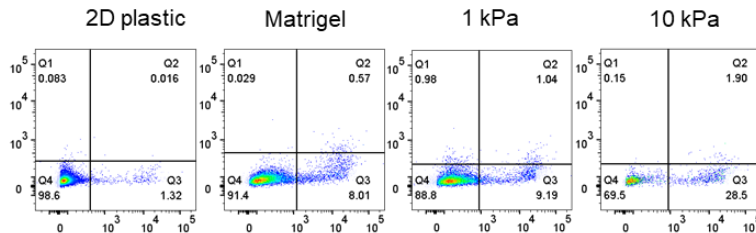

Gem + Abx

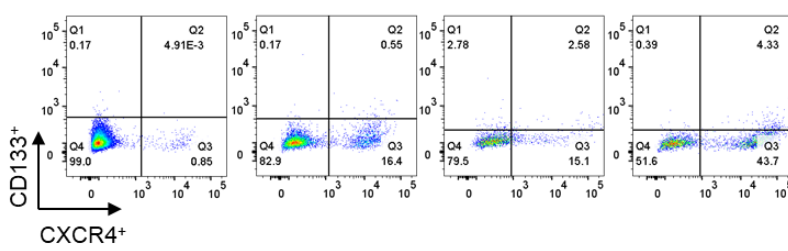

B

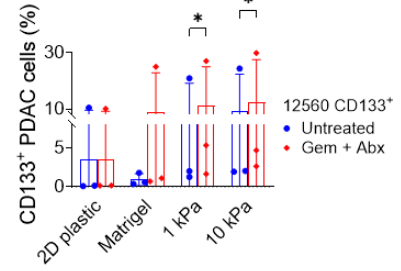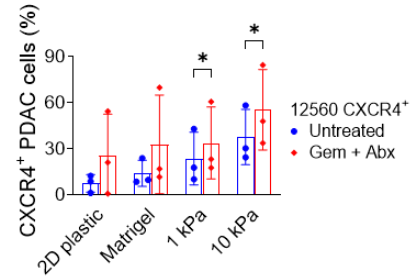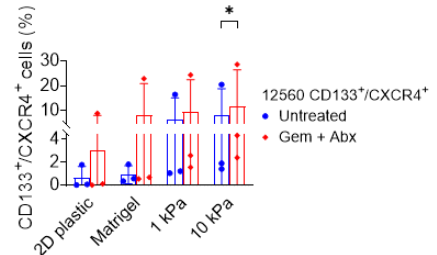

C

12560

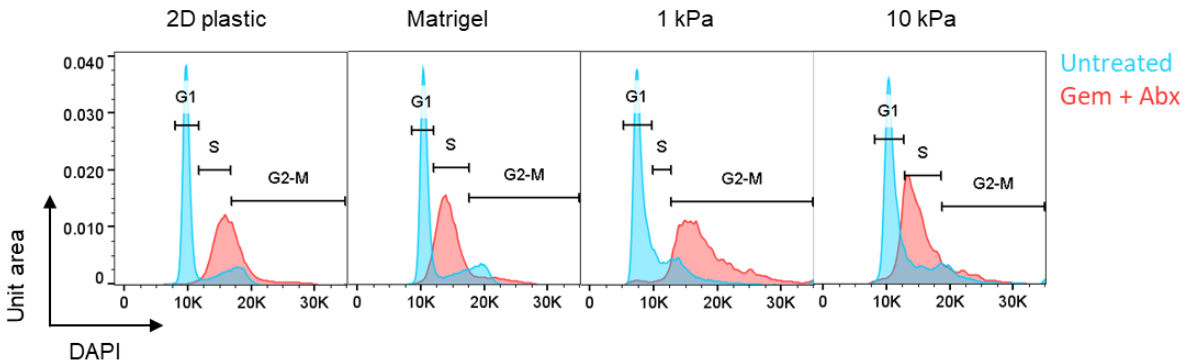

D

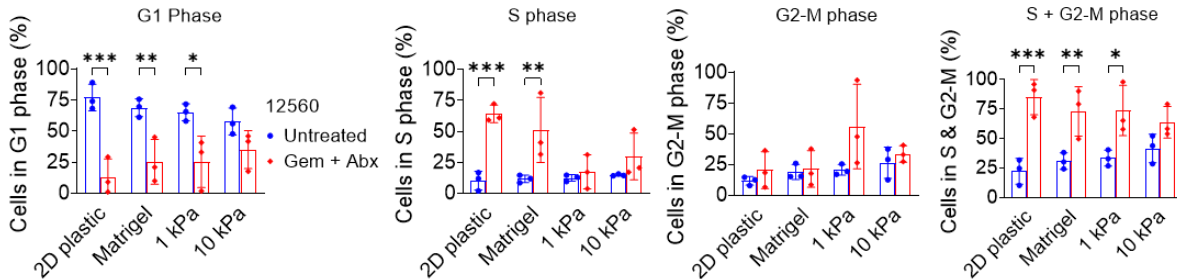

**Figure S6.** Matrix stiffness affects enrichment of CD133<sup>+</sup>/CXCR4<sup>+</sup> CSC population during chemotherapy. **(A,B)** CD133<sup>+</sup>/CXCR4<sup>+</sup> CSC population during drug treatment as evaluated by flow cytometry ( $n = 3$ ). **(A)** Representative flow cytometry plots for CD133<sup>+</sup>, CXCR4<sup>+</sup>, and CD133<sup>+</sup>/CXCR4<sup>+</sup> CSC subgroups in PDAC cells (12560) in the absence and presence of drug treatment. **(B)** Analysis of CD133<sup>+</sup>, CXCR4<sup>+</sup> and CD133<sup>+</sup>/CXCR4<sup>+</sup> CSC populations ( $n = 3$ ). **(C,D)** Response of PDAC cell cycle to Gem/Abx in 2D, Matrigel, 1 and 10 kPa PA-E3Y<sub>h</sub> hydrogels. **(C)** The representative cell cycle profiles of untreated (blue) and treated (red) PDAC cells (12560) gated to exclude debris and doublets. **(D)** Percentages represent the proportion of PDAC cells (12560) that were in G1, S, G2-M and S+G2-M phases compared to untreated controls ( $n = 3$ ). \*  $P < 0.05$ ; \*\*  $P < 0.01$ ; \*\*\*  $P < 0.001$ ; \*\*\*\*  $P < 0.0001$ .

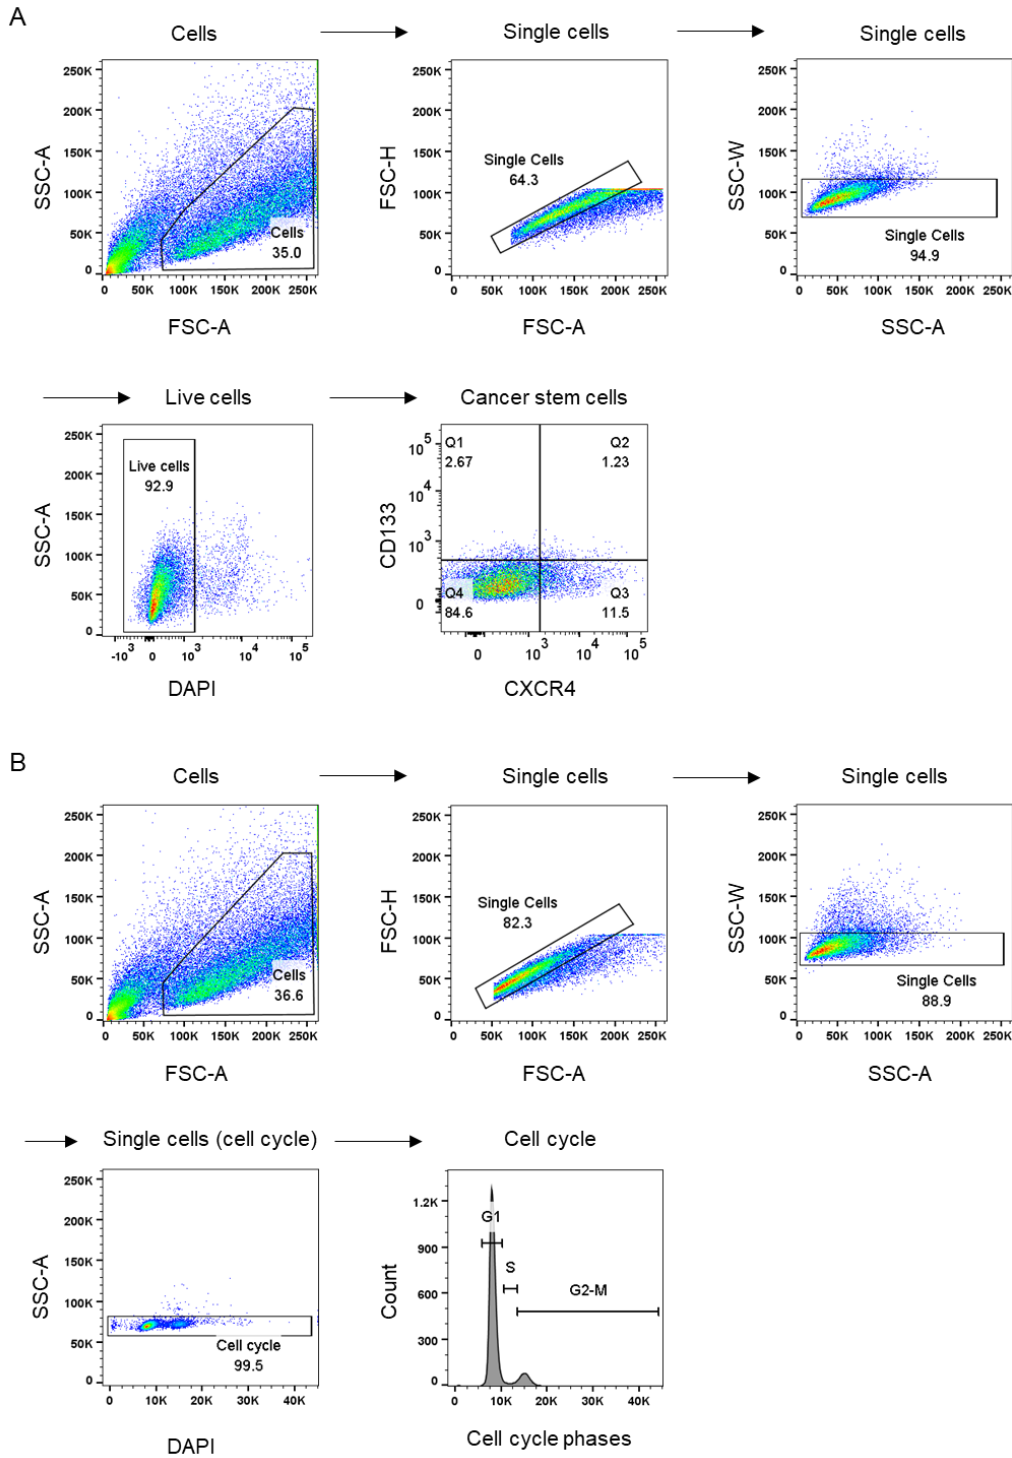

**Figure S7.** Flow cytometry gating strategy. **(A)** Flow cytometry gating strategy of CSC marker analysis. **(B)** Flow cytometry gating strategy of cell cycle analysis after drug treatment. SSC = side scatter, FSC = forward scatter.

The order of sample in WB: 2D plastic, Matrigel, 1 kPa, 10 kPa.

**Membrane 1**

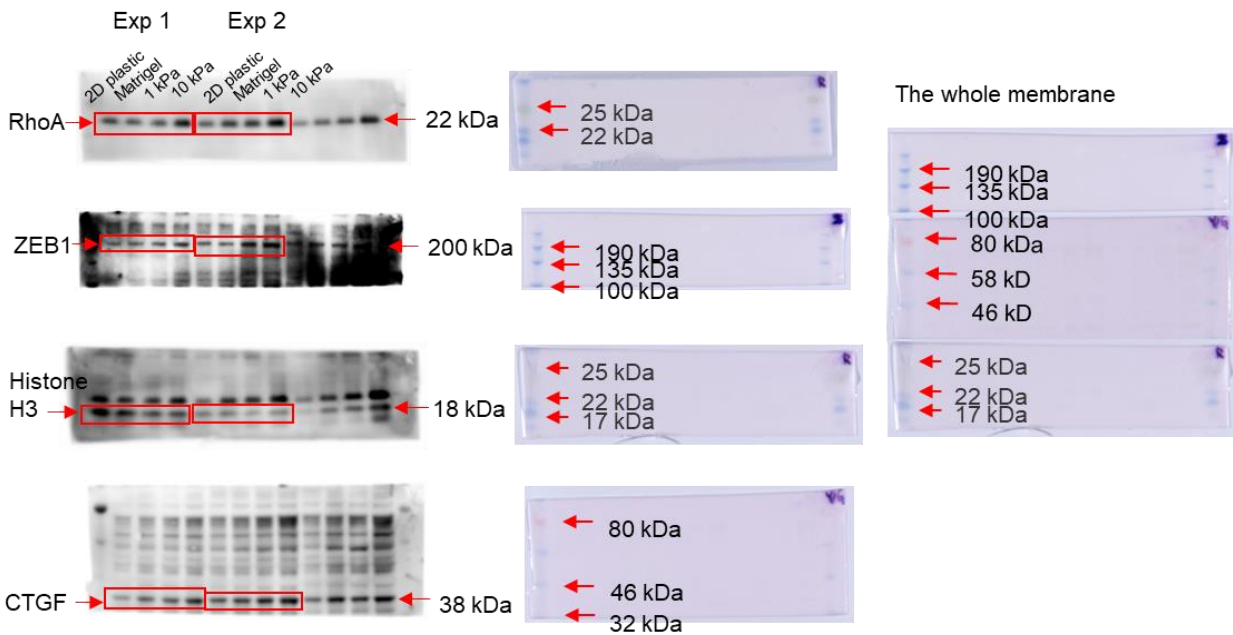

**Membrane 2**

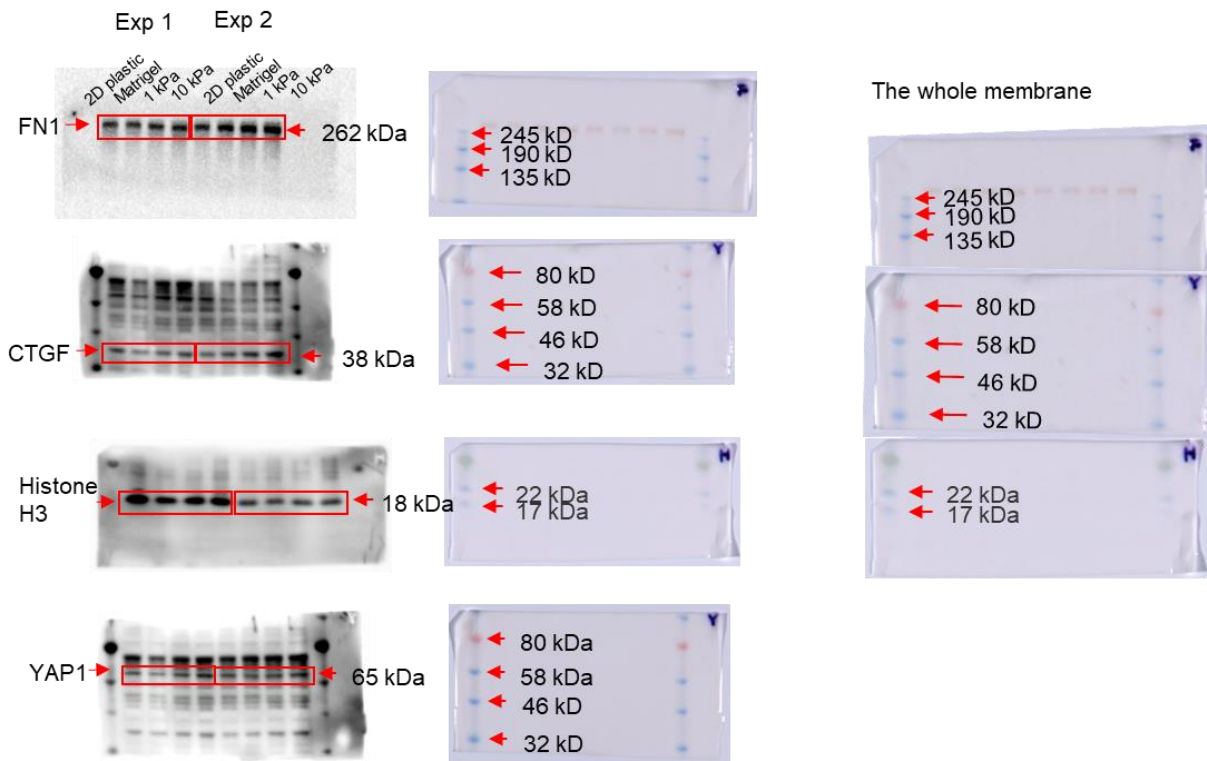

The order of sample in WB: 2D plastic, Matrigel, 1 kPa, 10 kPa.

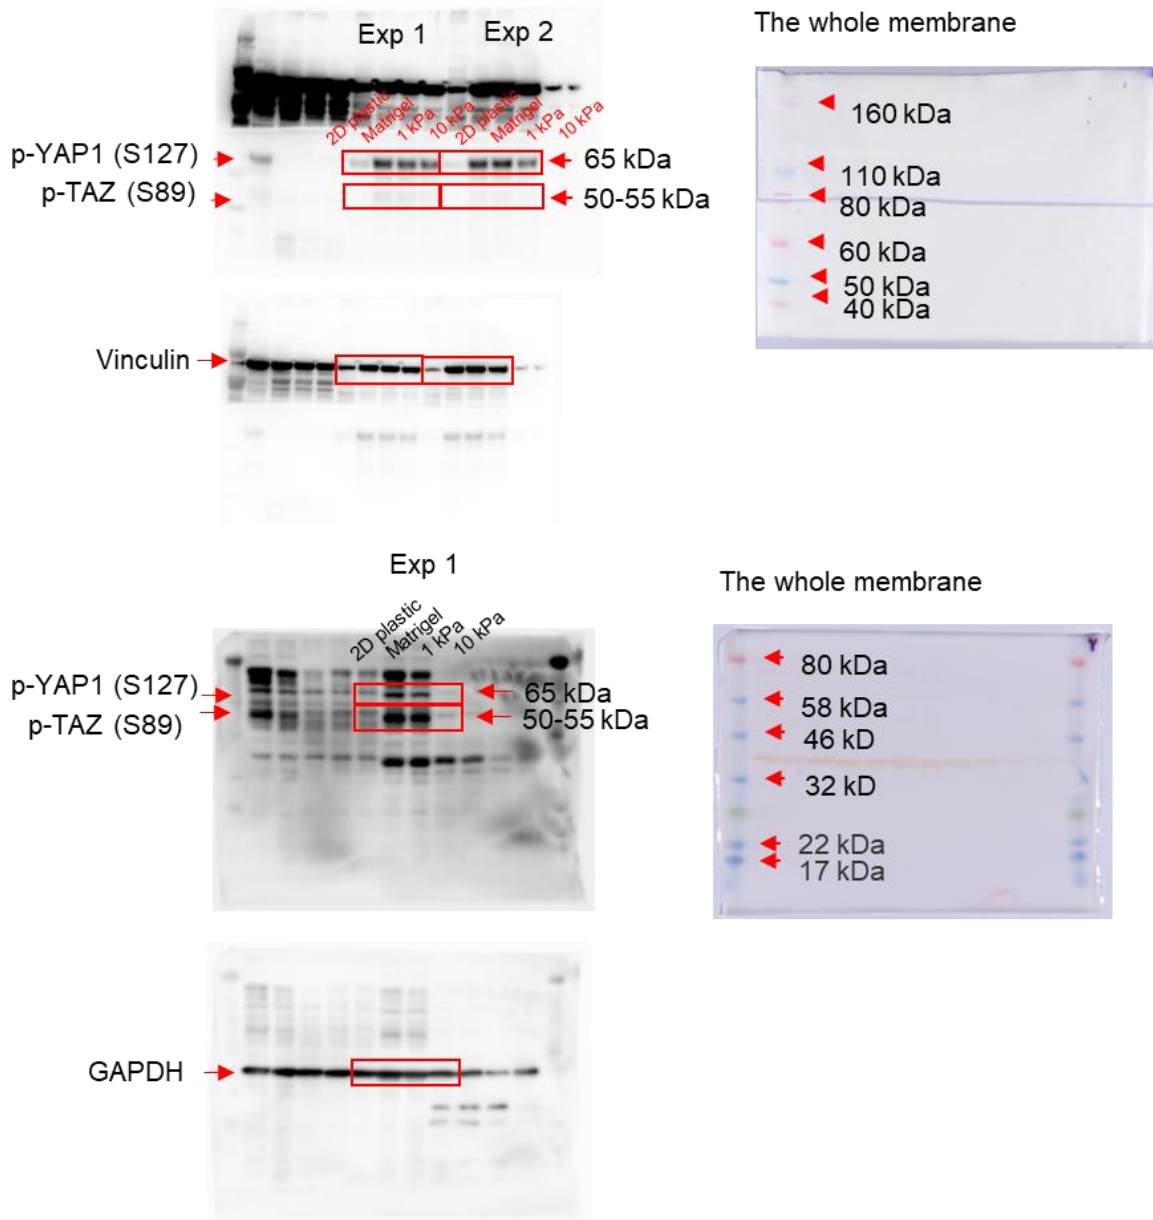

**Figure S8.** Raw data of western blot.
